# Supplementary material for: Amidation of methyl ester-functionalised poly(2-oxazoline)s as a powerful tool to create dual pH- and temperature-responsive polymers as potential drug delivery systems
Source: Royal Society of Chemistry journal article supplement (doi:10.1039/d3py00050h), 2023-01-01
Supplement: d3py00050h1.pdf [file d3py00050h1.pdf]

## Supporting information

### Amidation of methyl ester-functionalised poly(2-oxazoline)s as a powerful tool to create dual pH and temperature responsive polymers as potential drug delivery systems

Meike N. Leiske,<sup>a,#</sup> Ronak Singha,<sup>a</sup> Somdeb Jana,<sup>a</sup> Bruno G. De Geest,<sup>b</sup> Richard Hoogenboom<sup>a,\*</sup>

<sup>a</sup>Supramolecular Chemistry Group, Centre of Macromolecular Chemistry (CMAc), Department of Organic and Macromolecular Chemistry, Ghent University, Krijgslaan 281 S4, B-9000 Ghent, Belgium

<sup>b</sup>Department of Pharmaceutics and Cancer Research Institute Ghent (CRIG), Ghent University, Ottergemsesteenweg 460, B-9000 Ghent, Belgium

<sup>#</sup>Current address: Faculty of Biology, Chemistry & Earth Sciences, University of Bayreuth, Universitätsstraße 30, 95447 Bayreuth, Germany

\*Correspondence to: richard.hoogenboom@ugent.be

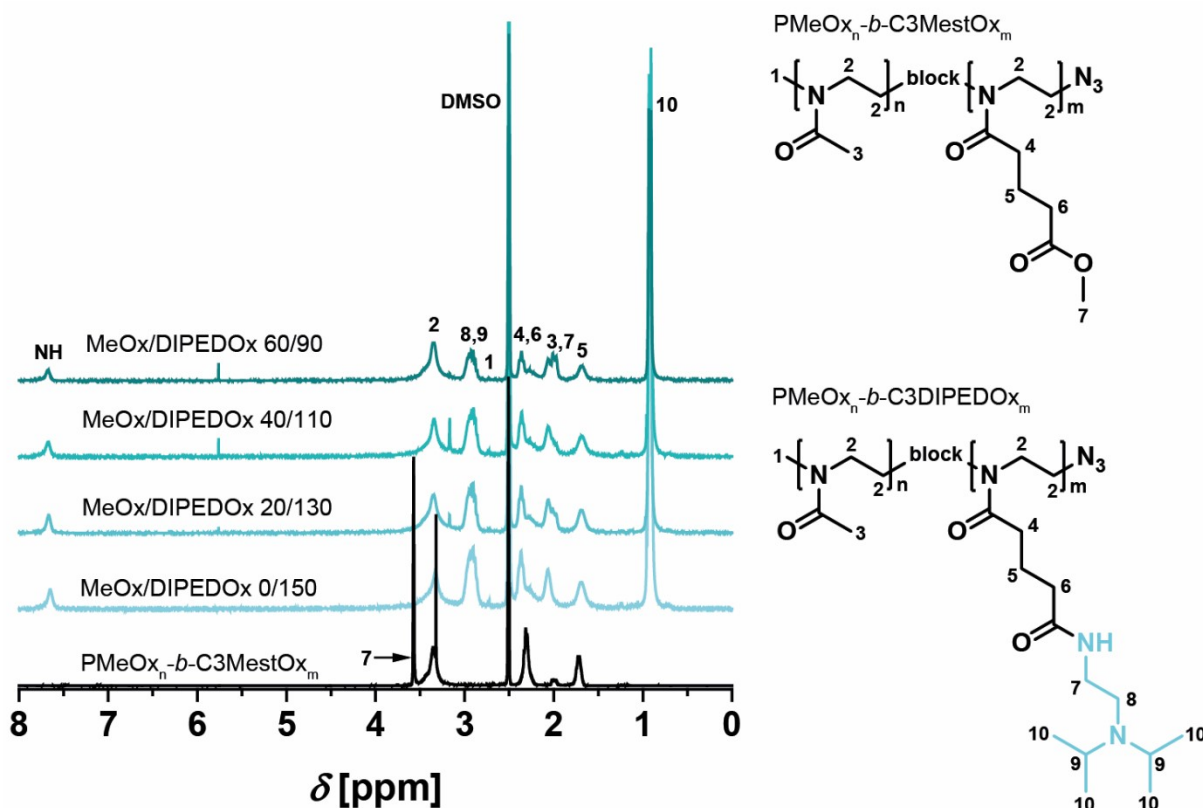

**Figure S1.** <sup>1</sup>H NMR spectra (300 MHz, DMSO-d<sub>6</sub>) of PMeOx<sub>n</sub>-*b*-PC3DIPEDOX<sub>m</sub> block (co)polymers and a representative NMR spectrum of the precursor PMeOx<sub>n</sub>-*b*-PC3MestOX<sub>m</sub>.

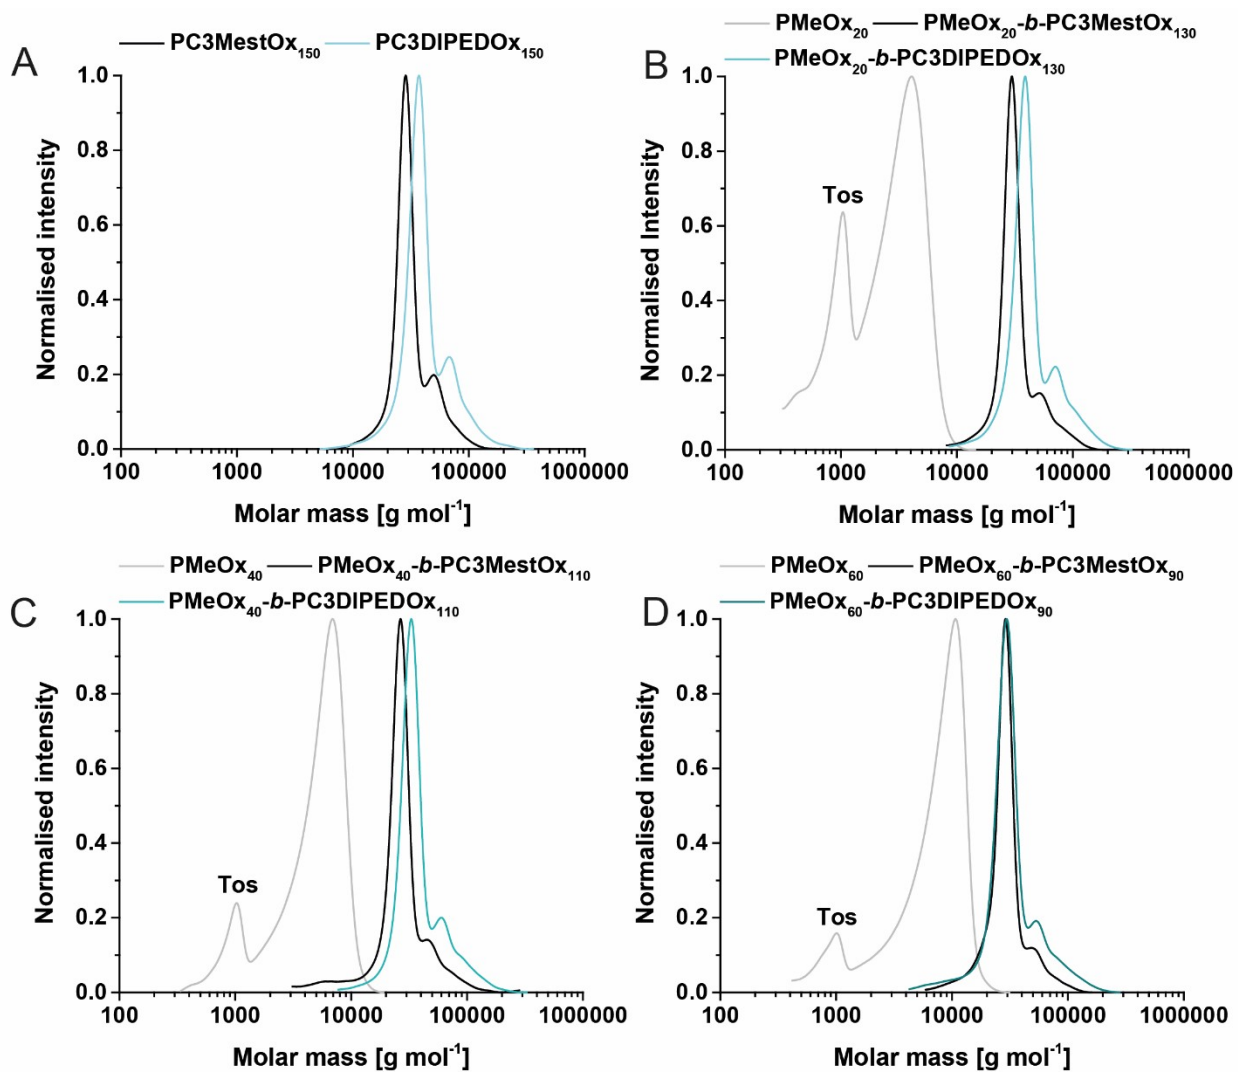

**Figure S2.** Molar mass distribution of PC3MestOx-containing (co)polymers as derived from SEC in DMAc (PMMA-calibration).

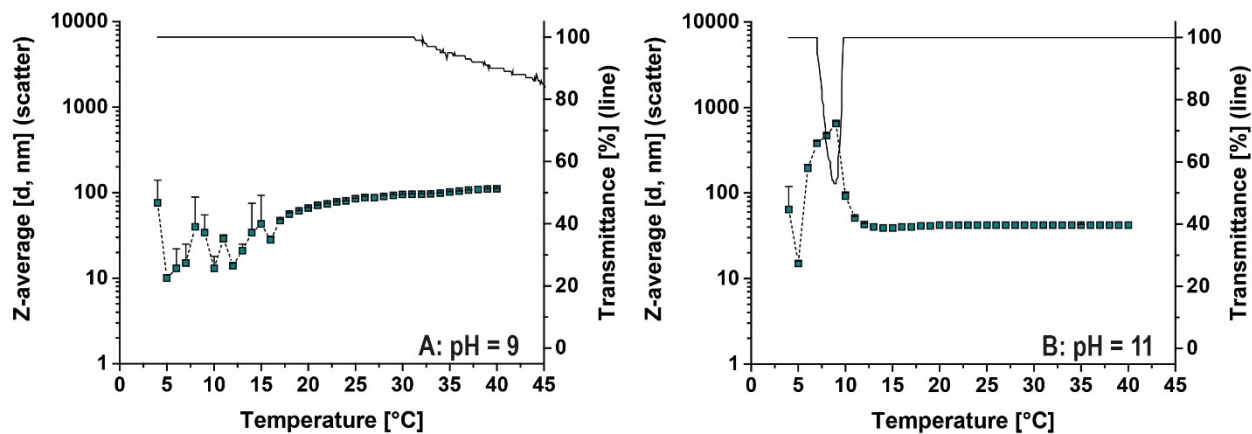

**Figure S3.** Temperature-dependent turbidity of PMeO<sub>x60</sub>-*b*-PC3DIPEDOX<sub>90</sub> in diH<sub>2</sub>O at indicated pH values. A: pH = 9. B: pH = 11. Polymer concentration: 5 mg mL<sup>-1</sup>. Transmittance was measured *via* turbidimetry measurements (Crystal16™). Three heating-cooling cycles were run (1 °C min<sup>-1</sup>), 2<sup>nd</sup> heating cycle is shown.

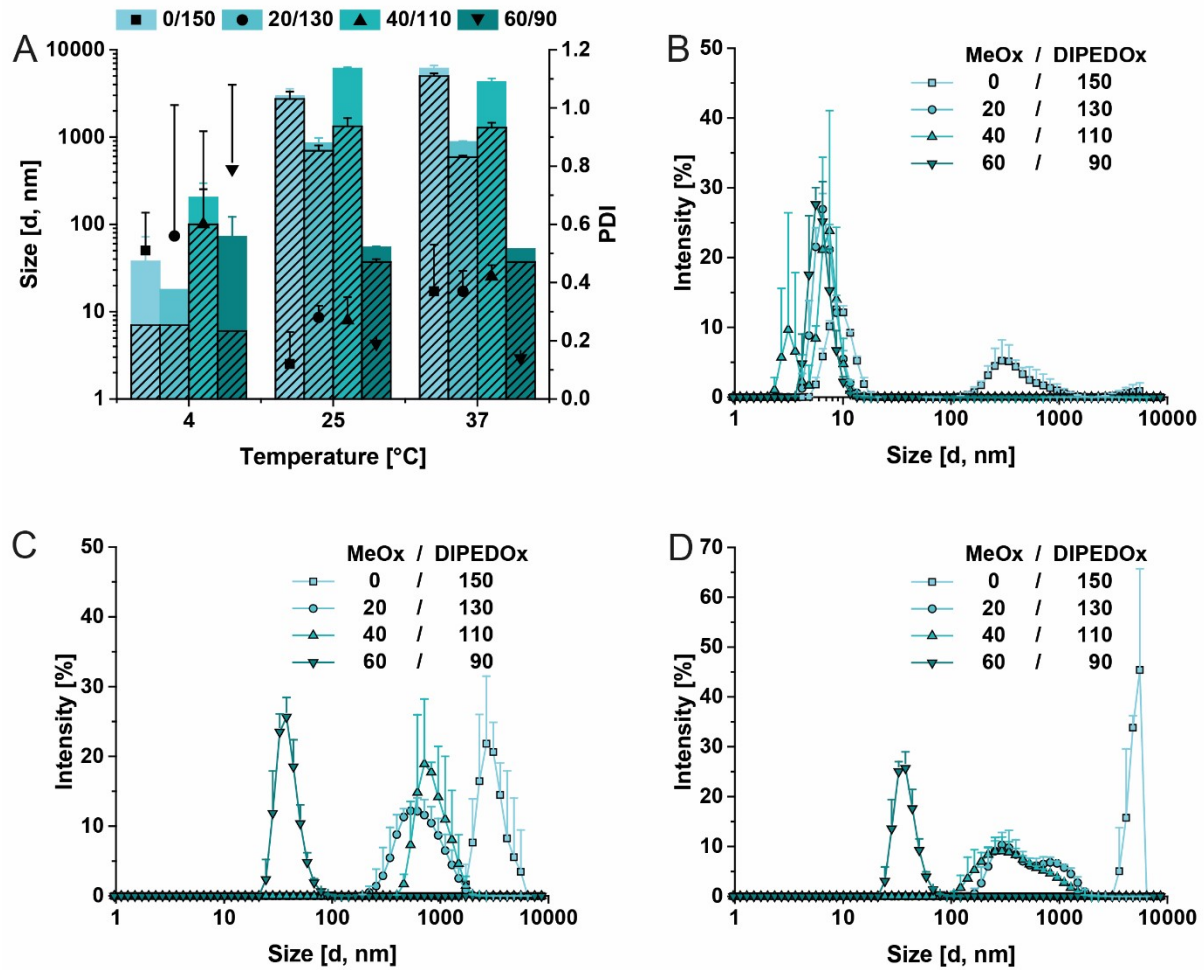

**Figure S4.** Temperature-dependent size analysis of polymeric aggregates at different temperatures at pH = 10 as determined by DLS measurements ( $c = 5 \text{ mg mL}^{-1}$ ). Data shown represents the mean and SD of 3 measurements with 3 runs each. A: Size and PDI of  $\text{PMeOx}_n\text{-}b\text{-C3DIPEDOX}_m$ . Monomer ratio shown as (n/m). Size is shown as columns. Solid columns refer to z-average. Striped columns refer to number PSD. Scatter refers to PDI. B-D: Intensity-weighted size distributions of indicated polymers at 4 °C (B), 25 °C (C), and 37 °C (D).

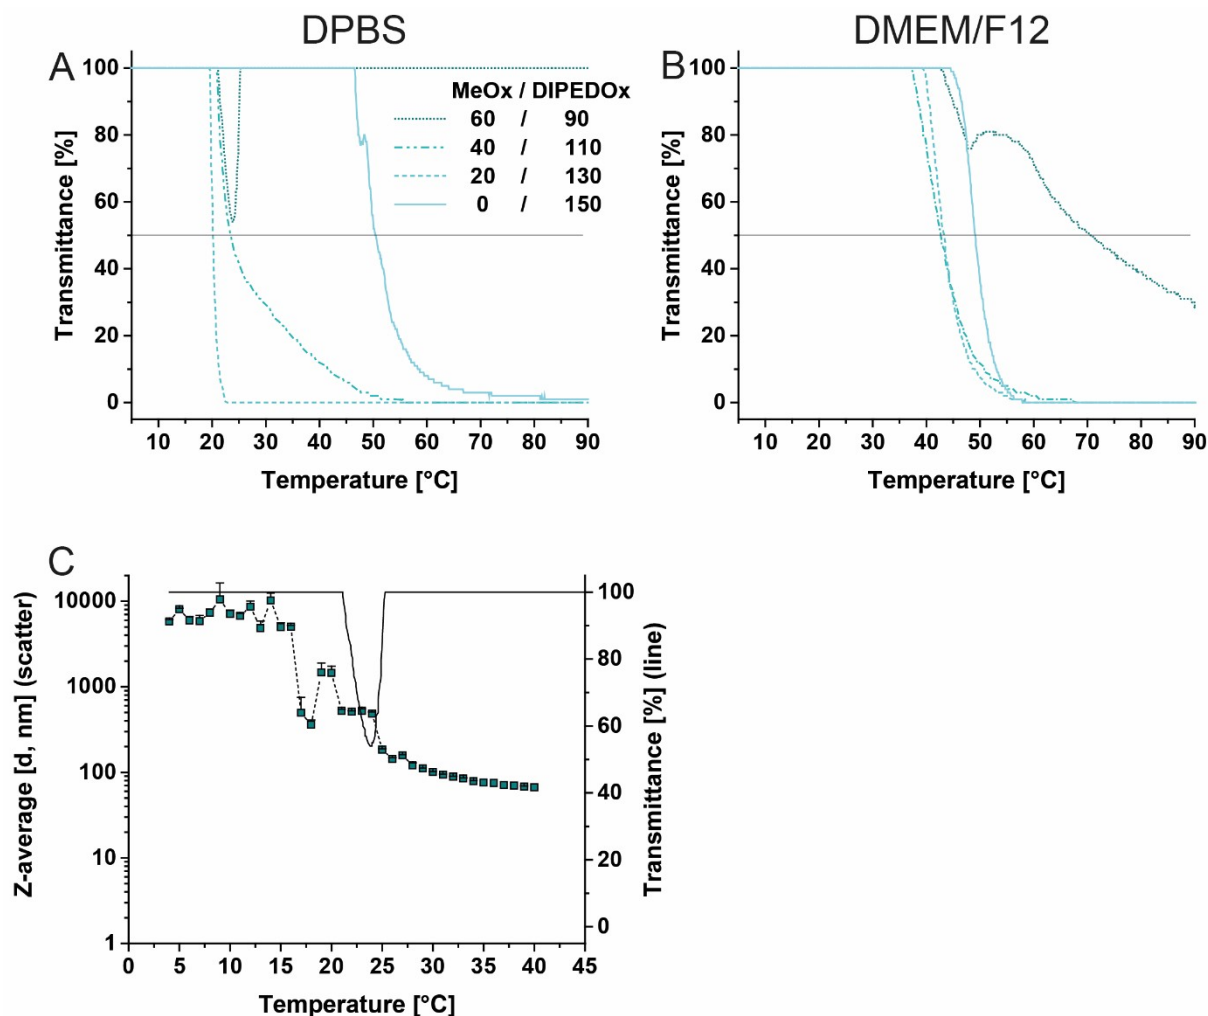

**Figure S5.** Temperature-dependent turbidity of DIPEDOx-modified (co)polymers in diH<sub>2</sub>O in different biologically relevant media. A: DPBS. B: DMEM/F12. C: Overlay of the temperature-dependent transmittance of PMeOx60-b-DIPEDOx90 (line) and particle size obtained from DLS measurements (scatter). Polymer concentration: 5 mg mL<sup>-1</sup>. Transmittance was measured *via* turbidimetry measurements (Crystal16™). Three heating-cooling cycles were run (1 °C min<sup>-1</sup>), 2<sup>nd</sup> heating cycle is shown.

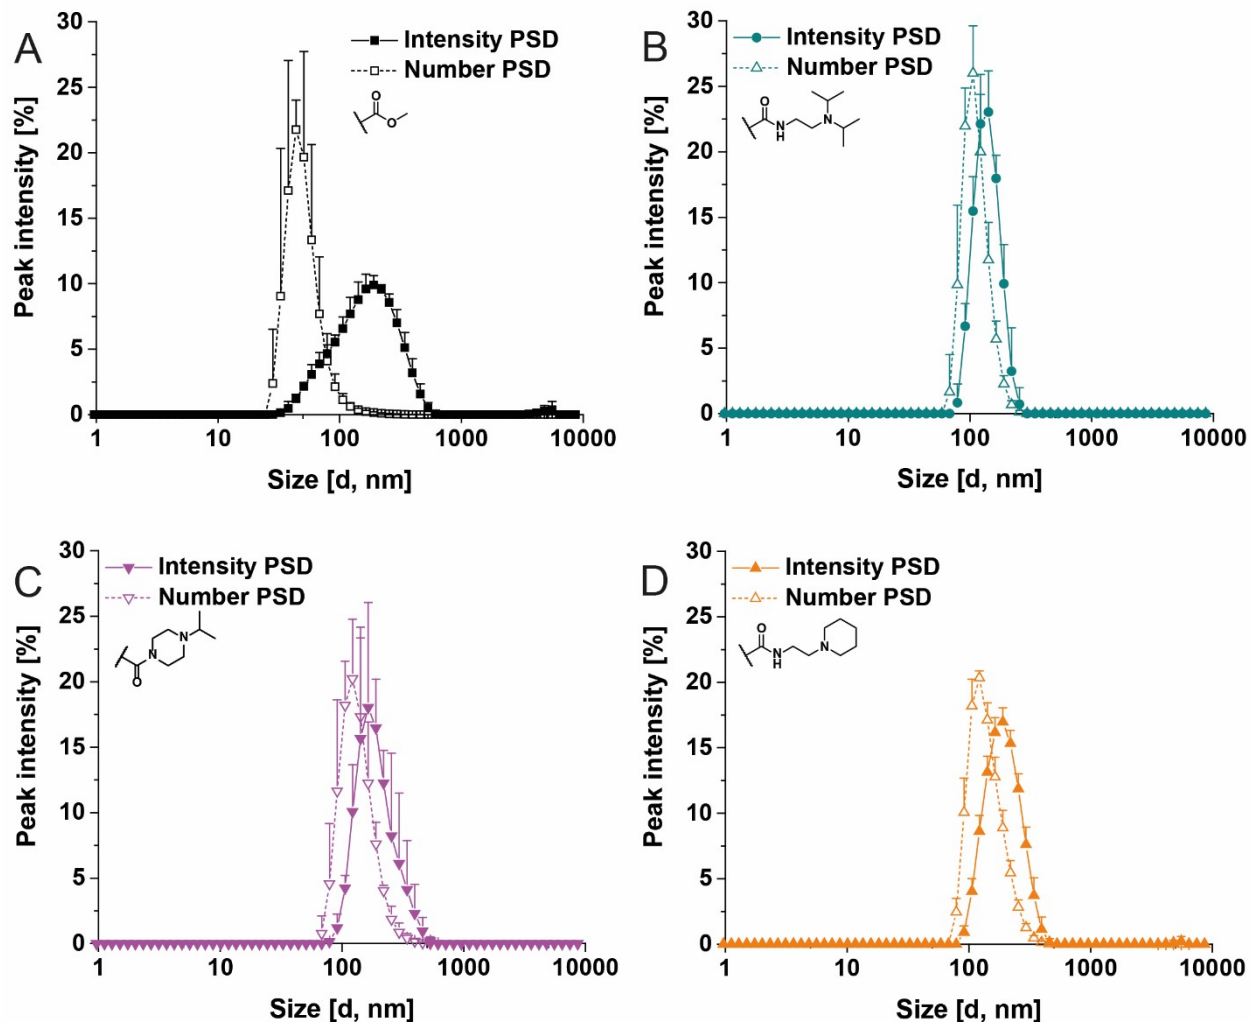

**Figure S6.** Overlay of intensity and number PSD traces of NPs from indicated polymers containing 5wt% Ptx and 5wt% RhB-C18 as obtained from DLS measurements at 37 °C (mean and SD of 5 measurements with 3 runs each). Polymer concentration: 1 mg mL<sup>-1</sup> in DMEM/F12. A: PMeOx<sub>60</sub>-*b*-C3MestOx<sub>90</sub>. B: PMeOx<sub>60</sub>-*b*-C3DIPEDOx<sub>90</sub>. C: PMeOx<sub>60</sub>-*b*-C3IPPOx<sub>90</sub>. D: PMeOx<sub>60</sub>-*b*-C3AEPOx<sub>90</sub>.

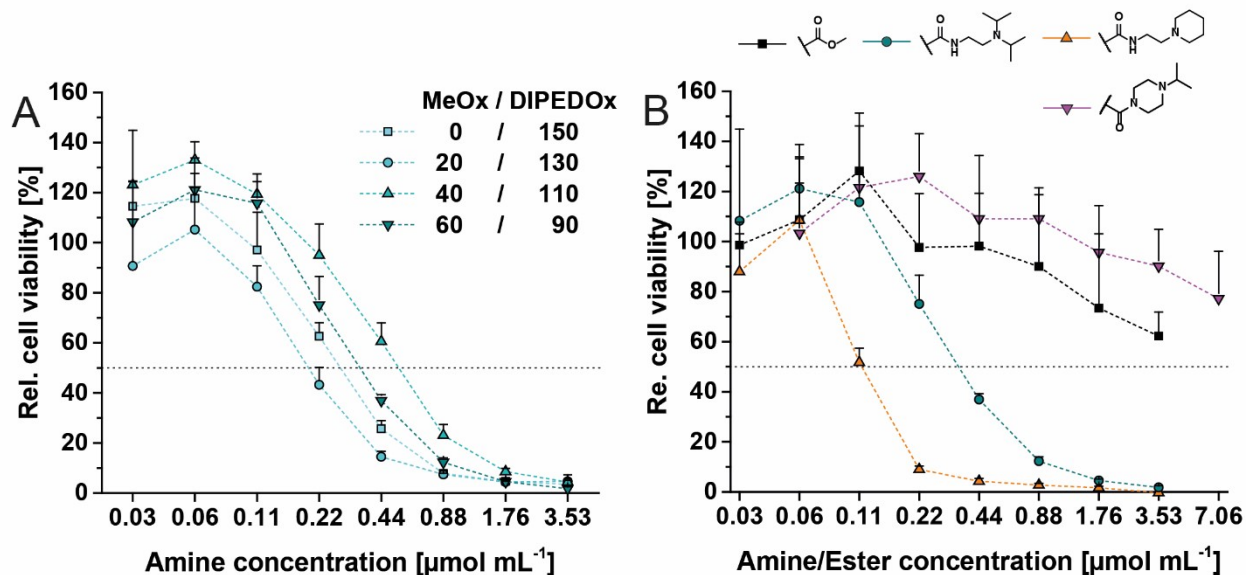

**Figure S7.** Cell viability of MDA-MB-231 breast cancer cells after incubation with polymers at indicated concentrations for 24 h. Cell viability was determined by MTT assay. Cells without polymer treatment served as negative control (NC, 100% cell viability). Values shown are relative to the NC. Cells treated with 20% DMSO served as positive control (PC, 0% cell viability, data not shown). A:  $\text{PMeOx}_n\text{-}b\text{-C3DIPEDOX}_m$ . B: Copolymers of MeOx and different amine-modified units in a ratio of 60 (MeOx) to 90 (amine).



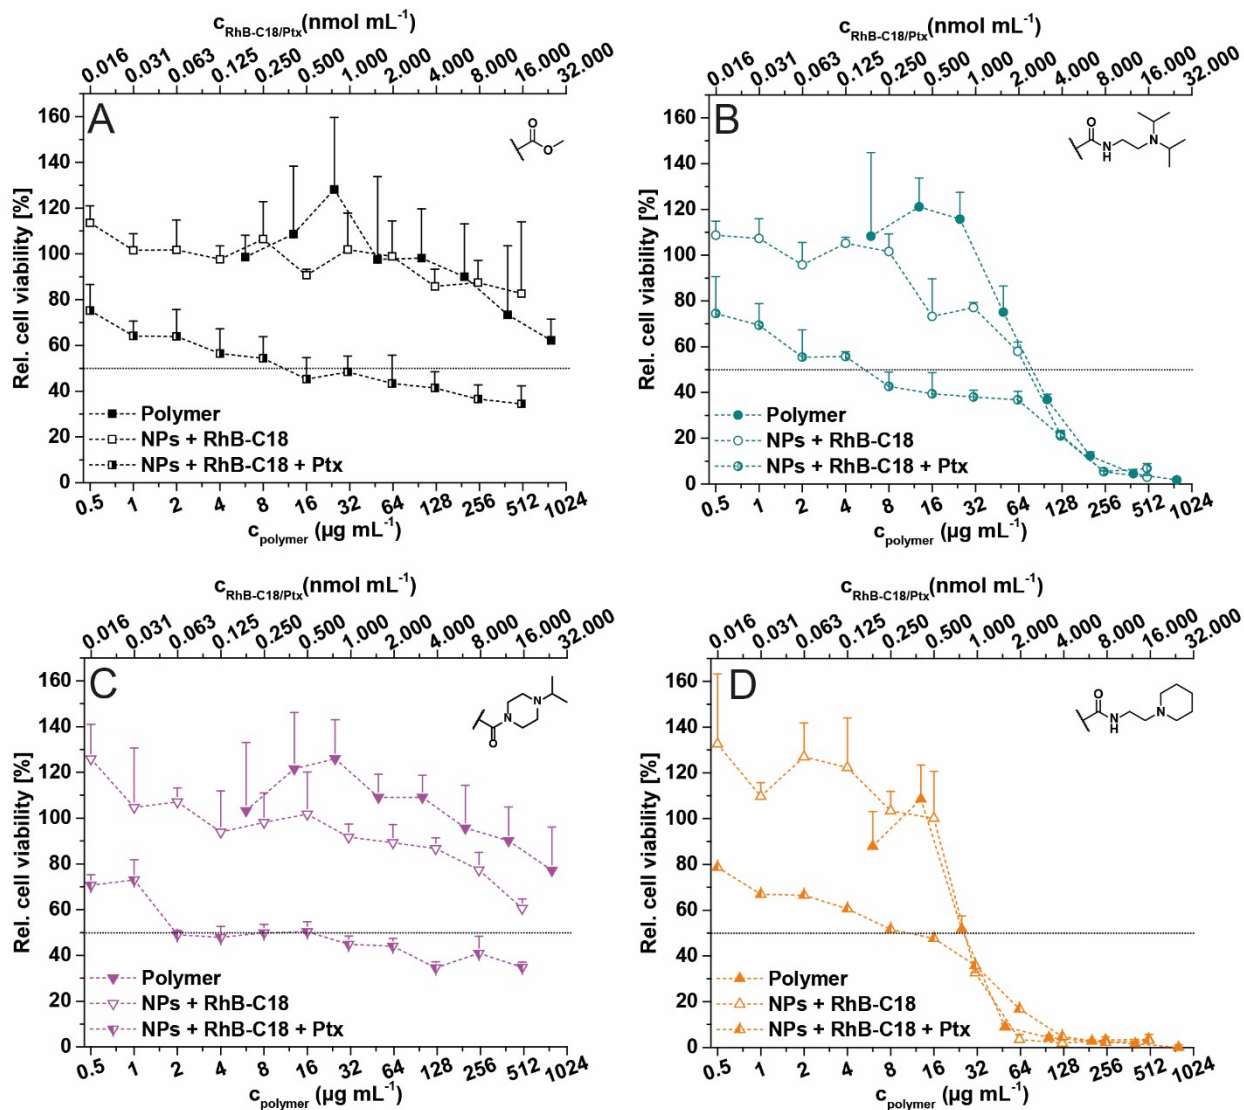

**Figure S8.** Cell viability of MDA-MB-231 breast cancer cells after incubation with polymers and dye/drug loaded NPs at indicated concentrations for 24 h. Cell viability was determined by MTT assay. Cells without polymer treatment served as negative control (NC, 100% cell viability). Values shown are relative to the NC. Cells treated with 20% DMSO served as positive control (PC, 0% cell viability, data not shown).



**Table S1.** Thermo-responsiveness of different amine-modified polymers at indicated conditions. Polymer concentration: 5 mg mL<sup>-1</sup>. Transmittance was measured *via* turbidimetry measurements (Crystal16™). Three heating-cooling cycles were run (1 °C min<sup>-1</sup>), T<sub>CP</sub> was calculated from 2<sup>nd</sup> heating cycle.

| Polymer                                                   | T <sub>CP</sub> [°C]         |                               |                 |                 |
|-----------------------------------------------------------|------------------------------|-------------------------------|-----------------|-----------------|
|                                                           | <i>diH<sub>2</sub>O pH 9</i> | <i>diH<sub>2</sub>O pH 10</i> | <i>DPBS</i>     | <i>DMEM/F12</i> |
| PC3DIPEDOX <sub>150</sub>                                 | 9                            | 15                            | 50              | 49              |
| PMeOx <sub>20</sub> - <i>b</i> -PC3DIPEDOX <sub>130</sub> | -                            | 14                            | 20              | 43              |
| PMeOx <sub>40</sub> - <i>b</i> -PC3DIPEDOX <sub>110</sub> | -                            | 13                            | 23              | 42              |
| PMeOx <sub>60</sub> - <i>b</i> -PC3DIPEDOX <sub>90</sub>  | -                            | 10 <sup>a</sup>               | - <sup>a</sup>  | 70 <sup>a</sup> |
| PMeOx <sub>60</sub> - <i>b</i> -PC3MestOx <sub>90</sub>   | n.a.                         | n.a.                          | 26 <sup>a</sup> | 25              |
| PMeOx <sub>60</sub> - <i>b</i> -PC3IPPOx <sub>90</sub>    | n.a.                         | n.a.                          | 77              | -               |
| PMeOx <sub>60</sub> - <i>b</i> -PC3AEPOx <sub>90</sub>    | n.a.                         | n.a.                          | 48 <sup>a</sup> | 85 <sup>a</sup> |

<sup>a</sup>Upon further heating, the turbidity of the sample decreased.

n.a. not available (no analysis was conducted).

**Table S2.** Polymer properties of PMeOx<sub>n</sub>-*b*-C3MestOx<sub>m</sub> (co)polymers at different temperatures in diH<sub>2</sub>O. Size properties were determined *via* DLS measurements at indicated temperatures. Data shown represents the mean and SD of 3 measurements with 3 runs each. Polymer concentration: 5 mg mL<sup>-1</sup>.

| Polymer                                                  | 4 °C                     |                           |             | 25 °C                    |                           |             | 37 °C                    |                           |             |
|----------------------------------------------------------|--------------------------|---------------------------|-------------|--------------------------|---------------------------|-------------|--------------------------|---------------------------|-------------|
|                                                          | <i>Z-average [d, nm]</i> | <i>Number PSD [d, nm]</i> | <i>PDI</i>  | <i>Z-average [d, nm]</i> | <i>Number PSD [d, nm]</i> | <i>PDI</i>  | <i>Z-average [d, nm]</i> | <i>Number PSD [d, nm]</i> | <i>PDI</i>  |
| PC3MestOx <sub>150</sub>                                 | 44 ± 43                  | 6 ± 0                     | 0.46 ± 0.06 | 1588 ± 124               | 1353 ± 48                 | 0.11 ± 0.03 | 3587 ± 669               | 2001 ± 414                | 0.29 ± 0.03 |
| PMeOx <sub>20</sub> - <i>b</i> -PC3MestOx <sub>130</sub> | 9 ± 0                    | 6 ± 0                     | 0.34 ± 0.05 | n.a.                     | n.a.                      | n.a.        | 6668 ± 665               | 962 ± 343                 | 0.54 ± 0.10 |
| PMeOx <sub>40</sub> - <i>b</i> -PC3MestOx <sub>110</sub> | 9 ± 2                    | 5 ± 0                     | 0.29 ± 0.05 | n.a.                     | n.a.                      | n.a.        | 140 ± 3                  | 73 ± 13                   | 0.16 ± 0.01 |
| PMeOx <sub>60</sub> - <i>b</i> -PC3MestOx <sub>90</sub>  | 11 ± 1                   | 5 ± 0                     | 0.41 ± 0.05 | 9439 ± 1630              | 1866 ± 3225               | 0.29 ± 0.11 | 2282 ± 77                | 2176 ± 53                 | 0.16 ± 0.04 |

n.a. data out of range of instrument.

**Table S3.** Temperature-dependent properties of PC3DIPEDOX<sub>150</sub> at different pH values. Size properties were determined *via* DLS measurements at indicated temperatures. Data shown represents the mean and SD of 3 measurements with 3 runs each. Polymer concentration: 5 mg mL<sup>-1</sup>.

| pH       | 4 °C                        |                                        |             | 25 °C                       |                                        |             | 37 °C                       |                                        |             |
|----------|-----------------------------|----------------------------------------|-------------|-----------------------------|----------------------------------------|-------------|-----------------------------|----------------------------------------|-------------|
|          | <i>Z-average</i><br>[d, nm] | <i>Number</i><br><i>PSD</i><br>[d, nm] | <i>PDI</i>  | <i>Z-average</i><br>[d, nm] | <i>Number</i><br><i>PSD</i><br>[d, nm] | <i>PDI</i>  | <i>Z-average</i><br>[d, nm] | <i>Number</i><br><i>PSD</i><br>[d, nm] | <i>PDI</i>  |
| 8        | 155 ± 59                    | 3 ± 0                                  | 0.68 ± 0.13 | 326 ± 115                   | 3 ± 0                                  | 0.51 ± 0.09 | 319 ± 132                   | 3 ± 0                                  | 0.51 ± 0.22 |
| 9        | 45 ± 23                     | 5 ± 0                                  | 0.39 ± 0.07 | 401 ± 7                     | 339 ± 18                               | 0.12 ± 0.04 | 556 ± 154                   | 421 ± 189                              | 0.23 ± 0.04 |
| 10       | 38 ± 34                     | 7 ± 0                                  | 0.51 ± 0.13 | 2980 ± 604                  | 2731 ± 596                             | 0.12 ± 0.11 | 6138 ± 473                  | 4986 ± 378                             | 0.37 ± 0.16 |
| DPBS     | 6837 ± 1583                 | 1773 ± 2875                            | 0.19 ± 0.11 | 1029 ± 75                   | 597 ± 45                               | 0.65 ± 0.06 | 4527 ± 327                  | 3776 ± 904                             | 0.23 ± 0.11 |
| DMEM/F12 | 3116 ± 1244                 | 7 ± 0                                  | 1.00 ± 0.00 | 345 ± 104                   | 7 ± 0                                  | 0.55 ± 0.34 | 217 ± 3                     | 184 ± 9                                | 0.18 ± 0.05 |

**Table S4.** Temperature-dependent properties of PMeOx<sub>20</sub>-*b*-PC3DIPEDOX<sub>130</sub> at different pH values. Size properties were determined *via* DLS measurements at indicated temperatures. Data shown represents the mean and SD of 3 measurements with 3 runs each. Polymer concentration: 5 mg mL<sup>-1</sup>.

| pH       | 4 °C                        |                                        |             | 25 °C                       |                                        |             | 37 °C                       |                                        |             |
|----------|-----------------------------|----------------------------------------|-------------|-----------------------------|----------------------------------------|-------------|-----------------------------|----------------------------------------|-------------|
|          | <i>Z-average</i><br>[d, nm] | <i>Number</i><br><i>PSD</i><br>[d, nm] | <i>PDI</i>  | <i>Z-average</i><br>[d, nm] | <i>Number</i><br><i>PSD</i><br>[d, nm] | <i>PDI</i>  | <i>Z-average</i><br>[d, nm] | <i>Number</i><br><i>PSD</i><br>[d, nm] | <i>PDI</i>  |
| 8        | 247 ± 239                   | 1 ± 0                                  | 0.79 ± 0.24 | 459 ± 615                   | 1 ± 0                                  | 0.71 ± 0.27 | 451 ± 91                    | 1 ± 0                                  | 0.38 ± 0.07 |
| 9        | 29 ± 24                     | 3 ± 0                                  | 0.40 ± 0.06 | 93 ± 2                      | 67 ± 4                                 | 0.08 ± 0.01 | 113 ± 1                     | 83 ± 6                                 | 0.10 ± 0.02 |
| 10       | 18 ± 0                      | 7 ± 0                                  | 0.56 ± 0.45 | 863 ± 114                   | 696 ± 105                              | 0.28 ± 0.04 | 887 ± 13                    | 588 ± 26                               | 0.37 ± 0.07 |
| DPBS     | 5979 ± 1479                 | 2078 ± 1796                            | 0.45 ± 0.26 | 771 ± 56                    | 597 ± 50                               | 0.37 ± 0.03 | 1828 ± 105                  | 1086 ± 105                             | 0.42 ± 0.14 |
| DMEM/F12 | 237 ± 105                   | 7 ± 1                                  | 0.68 ± 0.02 | 126 ± 38                    | 7 ± 0                                  | 0.57 ± 0.11 | 304 ± 13                    | 7 ± 2                                  | 0.37 ± 0.04 |

**Table S5.** Temperature-dependent properties of PMeOx<sub>40</sub>-*b*-PC3DIPEDOX<sub>110</sub> at different pH values. Size properties were determined *via* DLS measurements at indicated temperatures. Data shown represents the mean and SD of 3 measurements with 3 runs each. Polymer concentration: 5 mg mL<sup>-1</sup>.

| pH       | 4 °C                        |                                        |             | 25 °C                       |                                        |             | 37 °C                       |                                        |             |
|----------|-----------------------------|----------------------------------------|-------------|-----------------------------|----------------------------------------|-------------|-----------------------------|----------------------------------------|-------------|
|          | <i>Z-average</i><br>[d, nm] | <i>Number</i><br><i>PSD</i><br>[d, nm] | <i>PDI</i>  | <i>Z-average</i><br>[d, nm] | <i>Number</i><br><i>PSD</i><br>[d, nm] | <i>PDI</i>  | <i>Z-average</i><br>[d, nm] | <i>Number</i><br><i>PSD</i><br>[d, nm] | <i>PDI</i>  |
| 10       | 205 ± 92                    | 100 ± 153                              | 0.60 ± 0.32 | 6121 ± 221                  | 1328 ± 322                             | 0.27 ± 0.08 | 4342 ± 357                  | 1282 ± 177                             | 0.42 ± 0.04 |
| DPBS     | 3756 ± 500                  | 1351 ± 145                             | 0.56 ± 0.11 | 755 ± 73                    | 452 ± 218                              | 0.41 ± 0.06 | 1355 ± 32                   | 1145 ± 72                              | 0.23 ± 0.06 |
| DMEM/F12 | 2370 ± 1008                 | 5 ± 2                                  | 0.78 ± 0.31 | 247 ± 145                   | 6 ± 0                                  | 0.42 ± 0.02 | 151 ± 2                     | 97 ± 6                                 | 0.20 ± 0.02 |

**Table S6.** Temperature-dependent properties of PMeOx<sub>60</sub>-*b*-PC3DIPEDOX<sub>90</sub> at different pH values. Size properties were determined *via* DLS measurements at indicated temperatures. Data shown represents the mean and SD of 3 measurements with 3 runs each. Polymer concentration: 5 mg mL<sup>-1</sup>.

| pH       | 4 °C                        |                                        |             | 25 °C                       |                                        |             | 37 °C                       |                                        |             |
|----------|-----------------------------|----------------------------------------|-------------|-----------------------------|----------------------------------------|-------------|-----------------------------|----------------------------------------|-------------|
|          | <i>Z-average</i><br>[d, nm] | <i>Number</i><br><i>PSD</i><br>[d, nm] | <i>PDI</i>  | <i>Z-average</i><br>[d, nm] | <i>Number</i><br><i>PSD</i><br>[d, nm] | <i>PDI</i>  | <i>Z-average</i><br>[d, nm] | <i>Number</i><br><i>PSD</i><br>[d, nm] | <i>PDI</i>  |
| 8        | 89 ± 78                     | 1 ± 0                                  | 0.70 ± 0.22 | 310 ± 126                   | 1 ± 0                                  | 0.54 ± 0.19 | 966 ± 398                   | 1 ± 0                                  | 0.67 ± 0.21 |
| 9        | 76 ± 64                     | 2 ± 0                                  | 0.49 ± 0.15 | 85 ± 1                      | 67 ± 3                                 | 0.05 ± 0.03 | 107 ± 1                     | 85 ± 3                                 | 0.04 ± 0.02 |
| 10       | 73 ± 49                     | 6 ± 0                                  | 0.79 ± 0.29 | 55 ± 1                      | 37 ± 3                                 | 0.19 ± 0.01 | 53 ± 0                      | 37 ± 0                                 | 0.14 ± 0.01 |
| 11       | 64 ± 55                     | 41 ± 56                                | 0.50 ± 0.21 | 42 ± 0                      | 34 ± 1                                 | 0.02 ± 0.01 | 42 ± 0                      | 34 ± 0                                 | 0.01 ± 0.01 |
| DPBS     | 5803 ± 277                  | 4543 ± 375                             | 0.76 ± 0.42 | 184 ± 4                     | 130 ± 3                                | 0.15 ± 0.01 | 72 ± 0                      | 43 ± 2                                 | 0.24 ± 0.01 |
| DMEM/F12 | 205 ± 50                    | 6 ± 0                                  | 0.73 ± 0.09 | 714 ± 110                   | 7 ± 0                                  | 0.86 ± 0.02 | 2290 ± 304                  | 7 ± 1                                  | 0.85 ± 0.14 |

**Table S7.** Properties of nanoparticles prepared from indicated polymers. Nanoparticles were prepared *via* thin-film assembly method. Polymer concentration was 1 mg mL<sup>-1</sup>. Concentration of cargo refers to weight percent (wt%) relative to polymer mass. Size analyses were conducted *via* DLS measurements at 37 °C. Data shown represents the mean and SD of 5 measurements with 3 runs each.

| Polymer                                                  | Cargo                    | DLS                  |                       |             |
|----------------------------------------------------------|--------------------------|----------------------|-----------------------|-------------|
|                                                          |                          | Z-average<br>[d, nm] | Number PSD<br>[d, nm] | PDI         |
| PMeOx <sub>60</sub> - <i>b</i> -PC3DIPEDOX <sub>90</sub> | 5wt% RhB-C18             | 57 ± 1               | 25 ± 11               | 0.24 ± 0.00 |
|                                                          | 5wt% RhB-C18<br>5wt% Ptx | 148 ± 4              | 113 ± 5               | 0.23 ± 0.03 |
| PMeOx <sub>60</sub> - <i>b</i> -PC3MestOX <sub>90</sub>  | 5wt% RhB-C18             | 144 ± 6              | 93 ± 9                | 0.14 ± 0.01 |
|                                                          | 5wt% RhB-C18<br>5wt% Ptx | 144 ± 3              | 52 ± 7                | 0.26 ± 0.01 |
| PMeOx <sub>60</sub> - <i>b</i> -PC3IPPOX <sub>90</sub>   | 5wt% RhB-C18             | 164 ± 5              | 98 ± 14               | 0.28 ± 0.04 |
|                                                          | 5wt% RhB-C18<br>5wt% Ptx | 186 ± 6              | 137 ± 5               | 0.18 ± 0.08 |
| PMeOx <sub>60</sub> - <i>b</i> -PC3AEPOX <sub>90</sub>   | 5wt% RhB-C18             | 303 ± 27             | 217 ± 9               | 0.28 ± 0.05 |
|                                                          | 5wt% RhB-C18<br>5wt% Ptx | 168 ± 1              | 139 ± 1               | 0.07 ± 0.02 |

RhB-C18: Rhodamin B-octadecylester-perchlorate. Ptx: Paclitaxel.

**Table S8.** Cytocompatibility of different polymers and formulations.  $CC_{50}$  refers to the concentration at which 50% cell viability was observed. MDA-MB-231 breast cancer cells were incubated with polymers or formulations at indicated concentrations for 24 h. Cell viability was determined by MTT assay. Cells without polymer treatment served as negative control (NC, 100% cell viability). Values shown are relative to the NC. Cells treated with 20% DMSO served as positive control (PC, 0% cell viability, data not shown).  $CC_{50}$  values are derived from values shown in Figure 5 and Figure S6.

| Polymer                                                   | Formulation        | $CC_{50}$                            |                                              |                                  |
|-----------------------------------------------------------|--------------------|--------------------------------------|----------------------------------------------|----------------------------------|
|                                                           |                    | Polymer<br>[ $\mu\text{g mL}^{-1}$ ] | Amine / ester<br>[ $\mu\text{mol mL}^{-1}$ ] | Ptx<br>[ $\text{nmol mL}^{-1}$ ] |
| PC3DIPEDOX <sub>150</sub>                                 | Polymer            | 85                                   | 0.3                                          | n.a.                             |
| PMeOx <sub>20</sub> - <i>b</i> -PC3DIPEDOX <sub>130</sub> | Polymer            | 70                                   | 0.2                                          | n.a.                             |
| PMeOx <sub>40</sub> - <i>b</i> -PC3DIPEDOX <sub>110</sub> | Polymer            | 150                                  | 0.6                                          | n.a.                             |
| PMeOx <sub>60</sub> - <i>b</i> -PC3DIPEDOX <sub>90</sub>  | Polymer            | 126                                  | 0.4                                          | n.a.                             |
|                                                           | NP + RhB-C18       | 72                                   | n.a.                                         | n.a.                             |
|                                                           | NP + RhB-C18 + Ptx | 11                                   | n.a.                                         | 0.17                             |
| PMeOx <sub>60</sub> - <i>b</i> -PC3MestOX <sub>90</sub>   | Polymer            | > 512                                | > 3.5                                        | n.a.                             |
|                                                           | NP + RhB-C18       | > 512                                | n.a.                                         | n.a.                             |
|                                                           | NP + RhB-C18 + Ptx | 22                                   | n.a.                                         | 0.36                             |
| PMeOx <sub>60</sub> - <i>b</i> -PC3IPPOx <sub>90</sub>    | Polymer            | > 512                                | > 7.0                                        | n.a.                             |
|                                                           | NP + RhB-C18       | > 512                                | n.a.                                         | n.a.                             |
|                                                           | NP + RhB-C18 + Ptx | 2                                    | n.a.                                         | 0.06                             |
| PMeOx <sub>60</sub> - <i>b</i> -PC3AEPOx <sub>90</sub>    | Polymer            | 26                                   | 0.1                                          | n.a.                             |
|                                                           | NP + RhB-C18       | 26                                   | n.a.                                         | n.a.                             |
|                                                           | NP + RhB-C18 + Ptx | 11                                   | n.a.                                         | 0.34                             |

NP: Nanoparticle. RhB-C18: Rhodamin B-octadecylester-perchlorate. Ptx: Paclitaxel.

#### Reference

- [1] J. F. R. Van Guyse, M. N. Leiske, J. Verjans, Y. Bernhard and R. Hoogenboom, Accelerated Post-Polymerization Amidation of Polymers with Side-Chain Ester Groups by Intramolecular Activation, *Angew. Chem., Int. Ed.* 61 (29) (2022) e202201781, <https://doi.org/10.1002/anie.202201781>.
